# Supplementary material for: Radiation-induced transformations of matrix-isolated ethanol molecules at cryogenic temperatures: an FTIR study
Source: Royal Society of Chemistry journal article supplement (doi:10.1039/d3cp02834h), 2023-01-01
Supplement: d3cp02834h1.pdf [file d3cp02834h1.pdf]

**Electronic Supplementary Information for**

**Radiation-induced transformations of matrix-isolated ethanol molecules  
at cryogenic temperatures: a FTIR study**

Pavel V. Zasimov, Elizaveta V. Sanochkina, Daniil A. Tyurin, and Vladimir I. Feldman\*

*Department of Chemistry, Lomonosov Moscow State University, 119991 Moscow, Russia*

\*Corresponding author, e-mail: [feldman@rad.chem.msu.ru](mailto:feldman@rad.chem.msu.ru) (V.F.)

**Table S1** Main absorption maxima ( $\text{cm}^{-1}$ ) of the  $\text{C}_2\text{H}_5\text{OH}$  and  $\text{C}_2\text{D}_5\text{OH}$  isolated molecules in the noble-gas matrices. Tentative assignments are in italic. Multiple features most probably are due to the effect of matrix site splitting.

| Approximate assignment                                                | Ne                   | Ar                   | Kr                   | Xe                   | Gas phase <sup>S1</sup> |
|-----------------------------------------------------------------------|----------------------|----------------------|----------------------|----------------------|-------------------------|
| <b><math>\text{C}_2\text{H}_5\text{OH}</math></b>                     |                      |                      |                      |                      |                         |
| OH <sub>str</sub>                                                     | 3679.7 <sub>A</sub>  | 3660.2 <sub>A</sub>  | 3666.5               | 3642.0               | 3676.1                  |
|                                                                       | 3677.4 <sub>G</sub>  | 3655.2 <sub>G</sub>  | 3650.0 <sub>A</sub>  | 3639.7sh             | 3667.1                  |
|                                                                       |                      |                      | 3646.6 <sub>G</sub>  |                      | 3658.6                  |
|                                                                       |                      |                      |                      |                      | 3656.2                  |
| CH <sub>3</sub> <sub>a-str</sub> A''                                  | 3000.6               | 3000.2               | 2994.6               | 2996.9               | 2989.4                  |
|                                                                       | 2994.7               | 2995.0               | 2989.2               | 2989.7               |                         |
|                                                                       | 2990.0               |                      | 2985.3               |                      |                         |
| CH <sub>3</sub> <sub>a-str</sub>                                      | 2985.7               | 2984.4               | 2981.1               | 2981.0               | —                       |
|                                                                       |                      |                      | 2977.9               |                      |                         |
| CH <sub>3</sub> <sub>s-str</sub>                                      | 2955.0               | 2953.0               | 2948.2               | 2943.2               | —                       |
|                                                                       | 2942.2               | 2938.9               | 2934.8               | 2928.5               |                         |
| CH <sub>2</sub> <sub>a-str</sub> A''                                  | 2920.4               | 2917.1               | 2908.1               | 2903.4               | 2900.5                  |
|                                                                       | 2914.8               | 2912.6               | 2901.7               |                      |                         |
| CH <sub>2</sub> <sub>s-str</sub>                                      | 2902.7               | 2899.5               | 2896.5               | 2892.3               | —                       |
|                                                                       | 2896.8               | 2889.0sh             | 2892.7               | 2885.8               |                         |
|                                                                       |                      |                      |                      | 2880.6sh             |                         |
| CH <sub>2</sub> <sub>scis</sub>                                       | 1492.6               | 1487.2               | 1487.6               | 1482.9               | —                       |
|                                                                       |                      |                      | 1484.1               |                      |                         |
| CH <sub>3</sub> <sub>a-deform</sub>                                   | 1465.3               | 1463.3               | 1460.6               | 1456.8               | 1453.3                  |
|                                                                       |                      |                      |                      |                      | 1449.9                  |
| CH <sub>3</sub> <sub>a-deform</sub> A''                               | 1449.0               | 1445.0               | 1443.3               | 1440.4               | —                       |
|                                                                       | 1427.0               | 1416.6               | 1415.9               | 1413.9               | —                       |
| CH <sub>2</sub> <sub>wag</sub>                                        | 1413.8               |                      |                      |                      |                         |
|                                                                       | 1379.3               | 1371.5               | 1369.4               | 1367.4               | 1393.7                  |
| CH <sub>3</sub> <sub>s-deform</sub>                                   | 1373.0               |                      |                      |                      |                         |
|                                                                       | 1253.2               | 1254.7               | 1251.1               | 1251.2               | 1241.3                  |
| OH <sub>deform</sub>                                                  | 1241.3               | 1252.1               | 1237.6               | 1238.2               |                         |
|                                                                       |                      | 1239.5               |                      |                      |                         |
| CH <sub>2</sub> <sub>rock</sub> + CH <sub>3</sub> <sub>rock</sub> A'' | 1159.3               | 1160.2               | —                    | —                    | —                       |
|                                                                       | 1103.0               | 1102.7               | 1101.5               | 1101.3               | 1089.2                  |
| CCO <sub>str</sub> + CH <sub>3</sub> <sub>rock</sub>                  | 1091.0               | 1095.9               | 1094.6               | 1092.6               |                         |
|                                                                       | 1072.8               | 1091.7               | 1089.5               | 1088.9               |                         |
|                                                                       |                      | 1083.5               | 1082.8               | 1082.5               |                         |
|                                                                       |                      | 1077.0               |                      | 1074.7sh             |                         |
| CCO <sub>str</sub> + CH <sub>3</sub> <sub>rock</sub>                  | 1028.2               | 1025.1               | 1030.6               | 1032.5sh             | 1037.6                  |
|                                                                       | 1020.1               | 1016.6               | 1023.8               | 1031.5               | 1027.6                  |
|                                                                       | 1017.0sh             | 1009.3               | 1021.8               | 1027.1               |                         |
|                                                                       | 1012.9               |                      | 1015.8               | 1022.6sh             |                         |
| CCO <sub>str</sub>                                                    | 891.6 <sub>A</sub>   | 889.3 <sub>A</sub>   | 898.2                | 898.4sh <sub>A</sub> | 891.5                   |
|                                                                       | 889.8 <sub>G</sub>   | 886.4 <sub>G</sub>   | 887.9 <sub>A</sub>   | 895.0 <sub>G</sub>   | 883.0                   |
|                                                                       | 886.9sh <sub>G</sub> | 884.6sh <sub>G</sub> | 885.0 <sub>G</sub>   |                      | 879.4                   |
|                                                                       |                      |                      | 882.5sh <sub>G</sub> |                      |                         |
| CH <sub>2</sub> <sub>rock</sub> + CH <sub>3</sub> <sub>rock</sub> A'' | 814.5                | 811.9                | 809.3                | 817.4                | 801.0                   |

| <b>C<sub>2</sub>D<sub>5</sub>OH</b> |                     |                     |                     |          |        |
|-------------------------------------|---------------------|---------------------|---------------------|----------|--------|
| OH <sub>str</sub>                   | 3686.7 <sub>A</sub> | 3660.6 <sub>A</sub> | 3666.5              | 3642.6   | 3676.1 |
|                                     | 3680.0 <sub>G</sub> | 3655.6 <sub>G</sub> | 3649.9 <sub>A</sub> | 3640.4sh |        |
| CD <sub>3 a-str</sub> A''           | 2252.0              | 2256.4              | 2251.6              | 2252.0   | 2233.6 |
|                                     | 2244.3              | 2246.7              | 2242.4              | 2246.3   |        |
|                                     | 2240.4              | 2231.3              | 2239.6              | 2242.4   |        |
|                                     | 2236.0              |                     | 2231.8              | 2236.2   |        |
|                                     |                     |                     |                     | 2232.7sh |        |
| CD <sub>3 a-str</sub>               | 2211.6              | 2208.1              | 2205.3              | 2206.4   | –      |
| CD <sub>2 a-str</sub> A''           | 2186.2              | 2194.3              | 2195.8              | 2171.2   | 2185.0 |
|                                     | 2184.0              | 2191.0              | 2190.0sh            | 2170.6   |        |
|                                     | 2175.6              |                     | 2186.1              |          |        |
| CD <sub>3 s-str</sub>               | 2142.8              | 2141.6              | 2137.8              | 2144.7   | –      |
|                                     |                     |                     |                     | 2134.6   |        |
| CD <sub>2 s-str</sub>               | 2126.4              | 2121.9              | 2120.5              | 2114.7   | –      |
|                                     | 2123.9              | 2111.7              | 2118.8              | 2104.1   |        |
|                                     | 2111.6              | 2105.9              | 2107.4              | 2095.1   |        |
|                                     | 2106.2              | 2103.6              | 2101.2              | 2089.5   |        |
|                                     | 2102.9              | 2098.5              | 2093.5              | 2076.7   |        |
|                                     | 2096.0              | 2086.3              | 2084.2sh            | 2072.5   |        |
|                                     | 2084.2              | 2078.9              | 2081.0              | 2065.9   |        |
|                                     | 2080.3              |                     | 2078.5sh            |          |        |
|                                     |                     |                     | 2076.5sh            |          |        |
| ?                                   | 2033.5              | 2029.0sh            | 2022.8              | 2022.9   | –      |
|                                     | 2027.1              | 2026.7              | 2018.2              | 2017.2   |        |
|                                     | 2021.7              | 2022.1              |                     |          |        |
| ?                                   | 1316.3              | 1315.0              | 1316.5              | 1319.0sh | –      |
|                                     |                     |                     | 1313.6              | 1314.3   |        |
| CD <sub>3 s-deform</sub>            | 1285.3              | 1276.5              | –                   | 1277.8   | 1286.2 |
| ?                                   | 1279.2              |                     |                     |          | 1185.0 |
|                                     | 1192.0              | 1189.2              | 1166.3              | 1186.1   |        |
|                                     | 1182.8              | 1177.2sh            | 1163.3              | 1180.6   |        |
|                                     | 1180.6              | 1169.0              |                     |          |        |
| CD <sub>2 wag</sub>                 | 1166.5              | 1166.6              |                     |          | 1155.1 |
|                                     |                     | 1162.0              |                     |          |        |
|                                     | 1144.6              | 1143.3              | 1160.9              | 1143.6   |        |
|                                     | 1138.7sh            | 1136.1              | 1150.3              | 1128.4   |        |
|                                     | 1131.4              | 1129.2              | 1142.1              | 1124.9sh |        |
|                                     | 1125.6              | 1121.2sh            | 1133.5              | 1114.7   |        |
|                                     | 1118.6sh            | 1118.2              | 1126.9              |          |        |
|                                     | 1114.8              | 1115.0sh            | 1119.6              |          |        |
| 1109.5                              |                     | 1115.1              |                     |          |        |
| CD <sub>3 a-deform</sub>            | 1091.5              | 1097.7              | 1098.3              | 1094.5   | 1067.6 |
|                                     | 1086.8              | 1094.9              | 1093.7              | 1070.0   | 1064.0 |
|                                     | 1073.2              | 1071.2sh            | 1073.6              | 1066.1   |        |
|                                     | 1070.9              | 1068.4              | 1067.1              | 1061.4   |        |
|                                     | 1066.7              | 1064.4              | 1062.6              |          |        |

|                                                 |                    |                    |                    |                    |        |
|-------------------------------------------------|--------------------|--------------------|--------------------|--------------------|--------|
| CD <sub>2</sub> scic                            | 1060.3             | 1057.1             | 1055.2             | 1055.6             | 1057.8 |
|                                                 | 1058.1             |                    | 1053.9sh           | 1052.2             | 1053.8 |
|                                                 |                    |                    |                    | 1050.9sh           |        |
| CD <sub>3</sub> a-deform A''                    | 1051.4             | 1049.6             | 1048.4             | 1045.7             | –      |
| CH <sub>2</sub> rock + CH <sub>3</sub> rock A'' | 984.7              | 981.4              | 980.4              | –                  | –      |
|                                                 | 982.0              | 975.8              | 974.0              |                    |        |
|                                                 | 973.0              | 971.8              | 971.7              |                    |        |
|                                                 | 964.1              | 965.8              | 963.6              | 965.7              | 967.7  |
| OH deform                                       | 959.7              | 961.2              | 959.4sh            | 963.2sh            | 965.7  |
|                                                 | 957.5sh            |                    |                    | 960.6              |        |
|                                                 |                    |                    |                    | 956.4              |        |
| CCO <sub>str</sub> + CD <sub>3</sub> rock       | 922.0              | 920.4              | 919.3              | 904.8              | 902.7  |
|                                                 | 907.4              | 910.1              | 908.4              | 890.3              | 889.4  |
|                                                 | 905.5sh            | 905.0              | 902.3              | 887.0              | 882.6  |
|                                                 | 903.5sh            | 903.0              | 892.1              |                    | 878.4  |
|                                                 | 894.8              | 892.2              | 886.5              |                    |        |
|                                                 | 889.6              | 887.7              | 881.6sh            |                    |        |
|                                                 | 884.3              | 883.2              |                    |                    |        |
|                                                 | 881.7              |                    |                    |                    |        |
| CCO <sub>str</sub>                              | 744.4 <sub>A</sub> | 742.8 <sub>A</sub> | 745.8              | 749.9 <sub>A</sub> | 744.0  |
|                                                 | 741.0 <sub>G</sub> | 739.2 <sub>G</sub> | 742.4 <sub>A</sub> | 743.4 <sub>G</sub> |        |
|                                                 |                    | 738.3 <sub>G</sub> |                    |                    |        |

*A – anti-conformer; G – gauche-conformer; sh – shoulder.*

**Table S2** Absorption maxima ( $\text{cm}^{-1}$ ) of the species produced under X-ray radiolysis of the  $\text{C}_2\text{H}_5\text{OH}/\text{Ng}$  and  $\text{C}_2\text{D}_5\text{OH}/\text{Ng}$  1:1000 (Ng = Ne, Ar, Kr, or Xe) samples. Tentative assignments are in italic.

| Species                                         | Assignment                                       | Ne <sup>a</sup>                                                 | Ar                                   | Kr                               | Xe               | Ref.                                |        |
|-------------------------------------------------|--------------------------------------------------|-----------------------------------------------------------------|--------------------------------------|----------------------------------|------------------|-------------------------------------|--------|
| <b>C<sub>2</sub>H<sub>5</sub>OH</b>             |                                                  |                                                                 |                                      |                                  |                  |                                     |        |
| CH <sub>3</sub> CHO                             | 2ν <sub>6</sub>                                  | –                                                               | 2841.0                               | 2842.9<br>2838.2<br>2833.9       | 2823.4<br>2822.0 | S2, S3                              |        |
|                                                 |                                                  | ν <sub>5</sub> +ν <sub>6</sub>                                  | –                                    | –                                | –                |                                     | 2803.7 |
|                                                 |                                                  | ν <sub>5</sub> +ν <sub>7</sub> /ν <sub>7</sub> +ν <sub>12</sub> | 2753.3                               | 2751.1                           | 2752.0<br>2745.7 |                                     | 2743.2 |
|                                                 | CH <sub>str</sub>                                | 2719.8                                                          | 2730.0                               | 2725.6sh                         | 2731.5           | 2716.3sh<br>2713.8                  |        |
|                                                 |                                                  | 2716.7                                                          | 2726.5                               | 2723.4                           |                  |                                     |        |
|                                                 |                                                  |                                                                 | 2719.5                               | 2719.4sh<br>2711.8               |                  |                                     |        |
|                                                 | CO <sub>str</sub>                                | 1733.5                                                          | 1728.3                               | 1740.8                           | 1735.6           |                                     |        |
|                                                 |                                                  | –                                                               | –                                    | 1726.4                           |                  |                                     |        |
|                                                 | CH <sub>3</sub> d-deform                         |                                                                 |                                      | –                                | 1423.9<br>1419.9 |                                     |        |
|                                                 |                                                  | CH <sub>3</sub> s-deform                                        | 1352.7                               | 1352.5                           | 1349.4           | 1345.5                              |        |
|                                                 | CC <sub>str</sub>                                | 1117.7                                                          | 1123.9                               | 1121.7                           | 1122.7           | 1116.1                              |        |
|                                                 |                                                  | 1114.7                                                          | 1120.3                               | 1118.6                           |                  |                                     |        |
|                                                 |                                                  |                                                                 | 1116.0                               | 1113.8                           |                  |                                     |        |
|                                                 |                                                  |                                                                 | 1111.6                               | 1109.9                           |                  |                                     |        |
|                                                 | CCO <sub>deform</sub>                            | 509.6                                                           | 515.2                                | 516.8<br>515.1<br>510.3<br>505.7 | 515.4<br>512.1   |                                     |        |
|                                                 |                                                  |                                                                 |                                      |                                  |                  |                                     |        |
|                                                 |                                                  |                                                                 |                                      |                                  |                  |                                     |        |
|                                                 |                                                  |                                                                 |                                      |                                  |                  |                                     |        |
|                                                 |                                                  |                                                                 |                                      |                                  |                  |                                     |        |
| CH <sub>2</sub> CHOH                            | OH <sub>str</sub>                                | 3629.0                                                          | 3625.4<br>3621.2<br>3616.7<br>3609.4 | 3609.2<br>3607.1                 | –                | S2, S4, S5                          |        |
|                                                 |                                                  |                                                                 |                                      |                                  |                  |                                     |        |
|                                                 |                                                  |                                                                 |                                      |                                  |                  |                                     |        |
|                                                 |                                                  |                                                                 |                                      |                                  |                  |                                     |        |
|                                                 | CC <sub>str</sub>                                | 1669.0                                                          | 1672.0                               | –                                | –                |                                     |        |
|                                                 |                                                  | 1666.8                                                          | 1667.4                               |                                  |                  |                                     |        |
|                                                 |                                                  | 1665.4                                                          | 1665.2                               |                                  |                  |                                     |        |
|                                                 | Mixed mode<br>CH <sub>2</sub> CH <sub>OPLA</sub> | 1662.7                                                          | 1661.9                               |                                  |                  | 1078.8<br>814.6sh<br>812.8<br>804.0 |        |
|                                                 |                                                  | 1078.1                                                          | 1079.2                               | 1078.8                           |                  |                                     |        |
|                                                 |                                                  | 817.0                                                           | 823.0<br>817.6                       | 821.3<br>816.0                   |                  |                                     |        |
| C <sub>2</sub> H <sub>2</sub> ⋯H <sub>2</sub> O | CH <sub>a-str</sub>                              | 3252.2                                                          | 3239.8                               | 3234.0                           | –                | S2, S6                              |        |
|                                                 |                                                  | 3247.8                                                          |                                      |                                  |                  |                                     |        |
|                                                 | OH <sub>bend</sub>                               | 1598.9                                                          | 1593.1                               | 1591.1                           |                  |                                     |        |
|                                                 |                                                  | 1596.3sh                                                        |                                      | 1588.2                           |                  |                                     |        |
|                                                 | CH <sub>a-bend</sub>                             | 778.9sh                                                         | 786.1                                | 782.7                            |                  |                                     |        |
|                                                 |                                                  | 776.6<br>772.9<br>770.8                                         |                                      |                                  |                  |                                     |        |

|                                   |                                                                                                                                                                                                                                                                                        |                                                                                    |                                                                        |                                                                    |                                                                      |                                     |
|-----------------------------------|----------------------------------------------------------------------------------------------------------------------------------------------------------------------------------------------------------------------------------------------------------------------------------------|------------------------------------------------------------------------------------|------------------------------------------------------------------------|--------------------------------------------------------------------|----------------------------------------------------------------------|-------------------------------------|
| CH <sub>3</sub> CO <sup>•</sup>   | CO <sub>str</sub> <sup>b</sup>                                                                                                                                                                                                                                                         | –                                                                                  | –                                                                      | 1881.0<br>1847.7                                                   | 1880.2<br>1876.3<br>1844.4                                           | S2, S5,<br>S7, S8                   |
| H <sub>2</sub> CCO–H <sub>2</sub> | CH <sub>3</sub> <sub>deform</sub><br>CH <sub>2</sub> <sub>s-str</sub>                                                                                                                                                                                                                  | 3078.2                                                                             | 3071.7<br>3069.8sh<br>3067.7                                           | 1321.5<br>3066.6sh<br>3062.6                                       | 1318.4<br>3056.0<br>3052.5                                           | S2, S9                              |
| H <sub>2</sub> CCO                | CO <sub>str</sub><br>CH <sub>2</sub> <sub>scis</sub><br>CH <sub>2</sub> <sub>rock-opla</sub><br>CO <sub>rock-opla</sub><br>CH <sub>2</sub> <sub>s-str</sub><br>CO <sub>str</sub><br>CH <sub>2</sub> <sub>scis</sub><br>CH <sub>2</sub> <sub>rock-opla</sub><br>CO <sub>rock-opla</sub> | 2150.3<br>1386.8<br>592.3<br>527.5<br>3069.1<br>2150.3<br>1386.8<br>592.3<br>527.5 | 2148.1<br>1381.7<br>–<br>524.5<br>3062.8<br>2142.2<br>–<br>–<br>2031.2 | 2143.9<br>1378.0<br>–<br>–<br>3049.4<br>2139.8<br>–<br>–<br>2028.1 | 2139.3<br>1375.0<br>–<br>–<br>3040.7<br>2136.7<br>–<br>–<br>2021.0sh | S2, S7,<br>S10, S11<br>S2, S12, S13 |
| HCCO <sup>•</sup>                 | CCO <sub>deform</sub>                                                                                                                                                                                                                                                                  | 2023.9<br>2018.6sh<br>2015.4sh                                                     | 2022.1<br>2019.6sh                                                     | 2026.1<br>2019.6                                                   | 2016.4<br>2013.7sh                                                   |                                     |
| CCO                               | CO <sub>str</sub>                                                                                                                                                                                                                                                                      | 1972.6<br>1967.2                                                                   | 1973.5                                                                 | 1970.3                                                             | 1966.5                                                               | S2, S14                             |
| H <sub>2</sub> CO                 | CH <sub>2</sub> <sub>a-str</sub><br>CH <sub>2</sub> <sub>s-str</sub><br>CO <sub>str</sub><br>CH <sub>2</sub> <sub>scis</sub><br>CH <sub>2</sub> <sub>wag</sub>                                                                                                                         | –                                                                                  | 2865.3<br>2797.6<br>1740.8<br>1498.0<br>1169.6                         | 2854.1<br>2787.6<br>1738.8<br>1494.3<br>1166.5                     | –                                                                    | S15–S17                             |
| HCO <sup>•</sup>                  | CH <sub>str</sub><br>CO <sub>str</sub><br>HCO <sub>deform</sub>                                                                                                                                                                                                                        | 2482.2<br>1866.2<br>–                                                              | 2481.3<br>1862.8<br>1086.2                                             | 2475.4<br>1861.9<br>1081.2                                         | 2444.8<br>1858.8<br>1856.8<br>1076.3<br>1073.5                       | S18–S20                             |
| CO                                | CO <sub>str</sub>                                                                                                                                                                                                                                                                      | 2143.5sh<br>2141.2                                                                 | 2137.6                                                                 | 2135.7                                                             | 2132.4<br>2130.9sh                                                   | S7, S21                             |
| CH <sub>4</sub>                   | CH <sub>3</sub> <sub>d-str</sub><br>CH <sub>3</sub> <sub>d-deform</sub>                                                                                                                                                                                                                | 3020.3<br>1308.7                                                                   | 3026.0<br>3020.8sh<br>1305.6                                           | 3019.3<br>3016.4<br>1308.7<br>1305.3sh<br>1303.0<br>1300.4         | 3019.5<br>3012.5<br>3006.7<br>1309.4<br>1303.8<br>1300.6             | S22                                 |
| CH <sub>3</sub> <sup>•</sup>      | CH <sub>3</sub> <sub>OPLA</sub>                                                                                                                                                                                                                                                        | 607.3                                                                              | 606.5                                                                  | 609.3<br>604.0                                                     | 602.7                                                                | S7, S23                             |

|                                                   |                                    |         | <b>C<sub>2</sub>D<sub>5</sub>OH</b> |        |          |            |
|---------------------------------------------------|------------------------------------|---------|-------------------------------------|--------|----------|------------|
| CD <sub>3</sub> CDO                               | CD <sub>3</sub> s-str              | –       | –                                   | 2124.9 | 2118.6   | S2, S3     |
|                                                   |                                    |         |                                     | 2122.6 |          |            |
|                                                   | CD str                             | 2062.4  | 2061.6                              | 2056.6 | 2069.1   |            |
|                                                   |                                    | 2060.2  |                                     |        | 2054.3   |            |
|                                                   |                                    | 2054.7  |                                     |        | 2050.9   |            |
|                                                   | CO str                             | 1735.5  | 1746.3                              | 1731.5 | 1726.9   |            |
|                                                   |                                    | 1724.6  | 1733.8                              | 1728.8 |          |            |
|                                                   |                                    |         | 1732.2                              | 1725.0 |          |            |
|                                                   |                                    |         | 1726.9                              |        |          |            |
|                                                   | CD bend                            | 1154.8  | 1154.5                              | 1156.3 | 1152.7   |            |
|                                                   | CD <sub>3</sub> s-deform           | 1026.8  | 1024.9                              | 1022.4 | 1019.2   |            |
|                                                   | CC str                             | 943.9   | 939.5                               | 937.4  | 939.1    |            |
|                                                   |                                    | 940.3   |                                     |        |          |            |
|                                                   | 934.5                              |         |                                     |        |          |            |
| CCO deform                                        | 443.7                              | 442.2   | 443.3                               | 442.1  |          |            |
|                                                   | 436.7                              | 433.3   | 432.4                               | 439.5  |          |            |
|                                                   |                                    |         | 429.6                               |        |          |            |
| CD <sub>2</sub> CDOD                              | OD str                             | 2684.4  | 2679.8                              | 2667.1 | 2654.9   | S4         |
|                                                   |                                    |         | 2676.9sh                            |        |          |            |
| CD <sub>2</sub> CDOH                              | OH str                             | –       | 3626.9                              | 3609.2 | –        | S2, S4     |
|                                                   |                                    |         | 3623.3                              | 3607.1 |          |            |
|                                                   |                                    |         | 3615.5                              |        |          |            |
|                                                   | CC str                             | 1595.6  | 1598.6                              | 1595.3 | 1592.5   |            |
|                                                   |                                    | 1585.3  | 1597.1                              | 1593.8 | 1584.8   |            |
|                                                   |                                    | 1578.4  | 1590.0                              | 1587.7 |          |            |
|                                                   |                                    |         | 1581.6                              |        |          |            |
|                                                   | Mixed mode                         | 926.7   | 924.2                               | 922.5  | 920.9    |            |
|                                                   |                                    | 923.3   |                                     |        | 916.3sh  |            |
|                                                   | CD <sub>2</sub> CD <sub>OPLA</sub> | 651.6   | 653.4sh                             | 651.5  | 648.0    |            |
|                                                   |                                    | 651.5   | 649.8                               | 646.4  |          |            |
|                                                   |                                    | 649.9sh |                                     |        |          |            |
| C <sub>2</sub> D <sub>2</sub> ···HDO              | OD str                             | 2713.8  | 2714.6                              | –      | –        | S6         |
|                                                   | OH bend                            | 1399.6  | 1401.0                              | 1400.5 |          |            |
| HCCD···D <sub>2</sub> O                           | CD a-str                           | 2547.3  | 2542.2                              | –      | –        | S6         |
|                                                   |                                    | 2541.4  |                                     |        |          |            |
| DCCH···D <sub>2</sub> O                           | CD a-str                           | 2591.4  | 2578.3                              | 2573.6 | –        | S6         |
|                                                   | CH a-bend                          | 729.7   | 729.3                               | 725.3  |          |            |
| C <sub>2</sub> D <sub>2</sub> ···D <sub>2</sub> O | OD a-str                           | 2769.8  | 2775.0                              | 2766.9 | –        | S2, S6     |
|                                                   | CD a-str                           | 2414.1  | 2411.0                              | 2405.7 | 2401.0   |            |
|                                                   | OH bend                            | 1180.7  | 1176.2                              | 1173.0 | –        |            |
|                                                   | CD a-bend                          | 516.5   | 514.3                               | 512.9  |          |            |
| 510.7                                             |                                    |         |                                     |        |          |            |
| CD <sub>3</sub> CO <sup>•</sup>                   | CO str                             | –       | –                                   | 1862.2 | 1859.4   | S2, S7, S8 |
|                                                   | CD <sub>2</sub> scis               |         |                                     | –      | 1022.0   |            |
|                                                   |                                    |         |                                     |        | 1020.9sh |            |

|                                   |                                |                   |                       |          |          |                     |        |   |
|-----------------------------------|--------------------------------|-------------------|-----------------------|----------|----------|---------------------|--------|---|
| D <sub>2</sub> CCO–D <sub>2</sub> | CD <sub>2</sub> s-str          | 2270.2            | 2265.8                | 2260.3   | 2259.1   | S2                  |        |   |
|                                   |                                | 2265.7            |                       |          | 2255.4   |                     |        |   |
|                                   | v <sub>3</sub> +v <sub>4</sub> | 2156.5            | 2154.9                | 2151.1   | 2146.1   |                     |        |   |
|                                   | CO str                         | 2120.6            | 2118.7                | 2114.4   | 2110.3   |                     |        |   |
|                                   | CD <sub>2</sub> rock-opla      | –                 | –                     | –        | 538.4    |                     |        |   |
| D <sub>2</sub> CCO                | CO rock-opla                   |                   |                       | 432.2    | 429.3    | S2, S7,<br>S10, S11 |        |   |
|                                   | CD <sub>2</sub> s-str          | 2270.2            | 2260.0                | 2255.6   | 2250.4sh |                     |        |   |
|                                   | v <sub>3</sub> +v <sub>4</sub> | 2265.7            | 2149.2                | 2145.7   | –        |                     |        |   |
|                                   | CO str                         | 2153.3            | 2112.7                | 2110.1   | 2106.8   |                     |        |   |
| DCCO <sup>•</sup>                 | CCO deform                     | 1994.9            | 1993.3                | 1993.2sh | 1993.1   | S2, S12, S13        |        |   |
|                                   |                                | 1992.1            | 1990.0                | 1990.0   | 1989.2sh |                     |        |   |
| CCO                               | CO str                         | 1972.8            | 1972.2                | 1969.5   | 1965.3   | S2, S14             |        |   |
|                                   |                                | 1967.2            |                       | 1966.3   | 1962.8   |                     |        |   |
| HDCO                              | CH str                         | –                 | 2859.1                | –        | –        | S15, S17            |        |   |
|                                   |                                |                   | 2762.2                |          |          |                     |        |   |
|                                   |                                |                   | 2760.3                |          |          |                     |        |   |
|                                   |                                |                   | 2758.2                |          |          |                     |        |   |
|                                   |                                |                   | 2734.5                |          |          |                     |        |   |
|                                   |                                |                   | 1719.0                | 1716.1   |          |                     |        |   |
|                                   |                                |                   | 1396.0                | –        |          |                     |        |   |
|                                   |                                | D <sub>2</sub> CO | CO str                |          | 1719.0   |                     | 1716.1 |   |
|                                   |                                |                   | CHD scis              |          | 1396.0   |                     | –      |   |
|                                   |                                |                   | CD <sub>2</sub> a-str | –        | 2178.6   |                     | 2170.8 | – |
| CD <sub>2</sub> s-str             |                                |                   | 2069.3                | 2062.3   |          |                     |        |   |
| HCO <sup>•</sup>                  | CO str                         |                   | 1696.4                | 1693.6   |          |                     |        |   |
|                                   |                                |                   | 1694.2                |          |          |                     |        |   |
|                                   | CD <sub>2</sub> scis           |                   | 1099.2                | 1096.5   |          |                     |        |   |
|                                   | CD <sub>2</sub> rock           |                   | 987.7                 | 985.4    |          |                     |        |   |
|                                   | CD <sub>2</sub> wag            |                   | 942.5                 | 940.8    |          |                     |        |   |
|                                   | CH str                         | –                 | 2481.4                | –        | –        |                     |        |   |
|                                   | CO str                         | 1869.2            | 1862.8                | 1860.0   |          |                     |        |   |
| DCO <sup>•</sup>                  | CD str                         | 1866.1            |                       |          |          | S15, S19–S21        |        |   |
|                                   |                                | 1917.8            | 1925.2                | 1918.9   | 1922.7   |                     |        |   |
|                                   |                                | 1909.9            |                       |          | 1910.5   |                     |        |   |
| CO                                | CO str                         | –                 | 1801.1                | –        | –        | S7, S21             |        |   |
|                                   |                                | 852.2             | 849.7                 | 846.8    | 850.8    |                     |        |   |
|                                   |                                | 848.6             |                       |          |          |                     |        |   |
| CHD <sub>3</sub>                  | CH str                         | 2140.9            | 2137.6                | 2135.6   | 2132.7   | S7, S21             |        |   |
|                                   |                                |                   |                       |          | 2128.3sh |                     |        |   |
| CHD <sub>3</sub>                  | CH str                         | 2998.5            | 2998.5                | 2986.7sh | –        | S24                 |        |   |
|                                   |                                | 2996.6            | 2996.6                | 2984.8   |          |                     |        |   |
|                                   |                                | 2991.1            | 2990.9                |          |          |                     |        |   |
|                                   |                                | 2989.9sh          |                       |          |          |                     |        |   |
|                                   |                                | 1290.4            | 1288.1                | 1301.2   |          |                     |        |   |
|                                   | CD <sub>3</sub> rock           |                   | 1286.9                | 1297.7   |          |                     |        |   |
|                                   |                                |                   |                       | 1295.2   |          |                     |        |   |
|                                   |                                |                   |                       | 1284.6   |          |                     |        |   |
|                                   |                                | 1032.8            | 1030.2                | 1027.7   |          |                     |        |   |
|                                   |                                |                   | 1024.5                | 1022.3   |          |                     |        |   |
| CD <sub>3</sub> d-deform          | CD <sub>3</sub> d-deform       | 1002.8            | 1001.9                | 1000.2   |          |                     |        |   |
|                                   |                                |                   | 1000.1                | 998.4    |          |                     |        |   |



|                              |                          |                |       |       |                           |         |
|------------------------------|--------------------------|----------------|-------|-------|---------------------------|---------|
| CD <sub>4</sub>              | CD <sub>3</sub> d-deform | 996.4<br>990.4 | 993.9 | 992.1 | 997.2<br>992.9<br>990.0sh | S7, S25 |
| CD <sub>3</sub> <sup>*</sup> | CD <sub>3</sub> OPLA     | 457.4          | 455.1 | 454.4 | 454.0                     | S7, S23 |

*sh* – shoulder, *OPLA* – out of plane.

<sup>a</sup> In a Ne matrix both of H<sub>2</sub>CCO/H<sub>2</sub>CCO–H<sub>2</sub> (D<sub>2</sub>CCO/D<sub>2</sub>CCO–D<sub>2</sub>) may contribute to all observed absorptions of ketene except CH<sub>2</sub> *s-str* (CD<sub>2</sub> *s-str*), see Ref. S2 for details. Owing to this reason we provide the same values of absorption maxima both for H<sub>2</sub>CCO and H<sub>2</sub>CCO–H<sub>2</sub> (D<sub>2</sub>CCO/D<sub>2</sub>CCO–D<sub>2</sub>).

<sup>b</sup> Fermi resonance with an overtone or a combination band, see Ref. S8 for details.

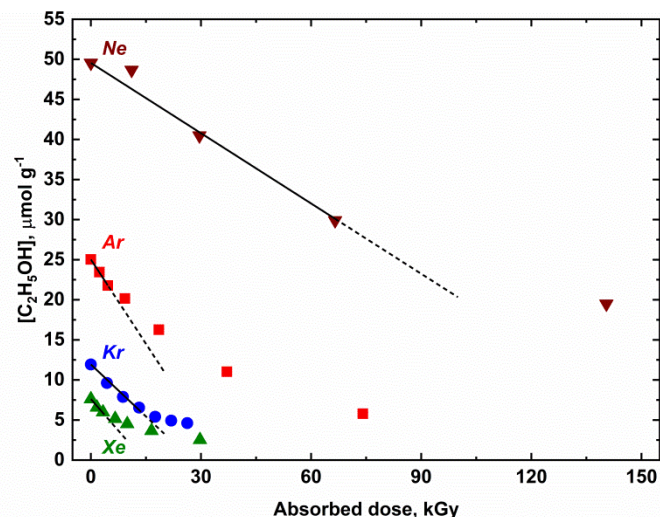

**Fig. S1** Kinetics of the radiation-induced decay of ethanol molecules in the  $C_2H_5OH/Ng$  1:1000 samples ( $Ng = Ne, Ar, Kr, \text{ or } Xe$ ) irradiated with X-rays. The relative concentration of ethanol in the samples irradiated to different doses was calculated by integration of the  $O-H_{str}$  absorption band. The initial molar mass concentrations of  $C_2H_5OH$  were determined based on molar a mixture ratio of 1:1000. The radiation-chemical yield of the  $C_2H_5OH$  degradation estimated from initial slopes of the recorded kinetics profiles are ca. 0.29, 0.67, 0.42, and 0.51  $\mu\text{mol J}^{-1}$  for Ne, Ar, Kr, and Xe, respectively, i.e. the efficiency of ethanol decomposition increases in a row  $Ne < Kr < Xe < Ar$ .

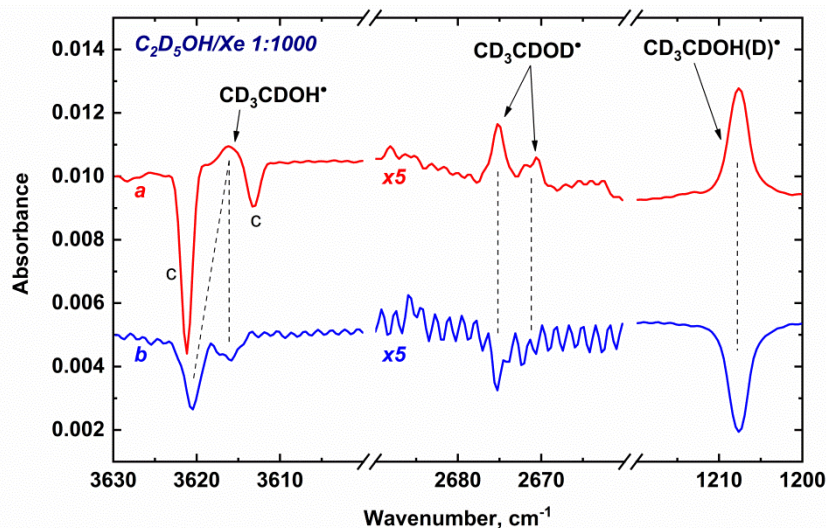

**Fig. S2** Fragments of the difference FTIR spectra (recorded at 4.4 K) showing the effect of the X-ray irradiation for 5 min (a) and UV photolysis (254 nm) for 30 min (b) of the  $C_2D_5OH/Xe$  (1:1000) in the regions containing the absorptions bands assigned to the  $CD_3CDOH(D)^\bullet$  radicals. Absorption features in the OH stretching region observed in the deposited sample and decreased upon irradiation were tentatively attributed to the ethanol dimers<sup>S26</sup> (marked with 'c').

### Supplementary references

- S1. Perchard, J. P.; Josien, M. L. *J. Chim. Phys.*, **1968**, *65*, 1834–1855.
- S2. Zasimov, P. V.; Sanochkina E. V.; Feldman, V. I. *Phys. Chem. Chem. Phys.*, **2022**, *24*, 1, 419–432.
- S3. Wiberg, K. B.; Thiel, Y.; Goodman, L.; Leszczynski, J. *J. Phys. Chem.*, **1995**, *99*, 38, 13850–13864.
- S4. Hawkins M.; Andrews, L. *J. Am. Chem. Soc.*, **1983**, *105*, 9, 2523–2530.
- S5. Estep, M. L.; Morgan, W. J.; Winkles, A. T.; Abbott, A. S.; Villegas-Escobar, N.; Mullinax, J. W.; Turner, W. E.; Wang, X.; Turney, J. M.; Schaefer III, H. F. *Phys. Chem. Chem. Phys.*, **2017**, *19*, 40, 27275–27287.
- S6. Engdahl A.; Nelander, B. *Chem. Phys. Lett.*, **1983**, *100*, 2, 129–132.
- S7. Das, P.; Lee, Y. P. *J. Chem. Phys.*, **2014**, *140*, 24, 244303.
- S8. Jacox, M. E. *Chem. Phys.*, **1982**, *69*, 3, 407–422.
- S9. Zasimov, P. V.; Ryazantsev, S. V.; Tyurin, D. A.; Feldman, V. I. *Mon. Not. R. Astron. Soc.*, **2020**, *491*, 4, 5140–5150.
- S10. Moore, C. B.; Pimentel, G. C. *J. Chem. Phys.*, **1963**, *38*, 12, 2816–2829.
- S11. Haller, I.; Pimentel, G. C. *J. Am. Chem. Soc.*, **1962**, *84*, 15, 2855–2857.
- S12. Jacox, M. E.; Olson, W. B. *J. Chem. Phys.*, **1987**, *86*, 6, 3134–3142.
- S13. Forney, D.; Jacox, M. E.; Thompson, W. E. *J. Mol. Spectr.*, **1995**, *170*, 1, 178–214.
- S14. Jacox, M. E.; Milligan, D. E.; Moll, N. G.; Thompson, W. E. *J. Chem. Phys.*, **1965**, *43*, 10, 3734–3746.
- S15. Saenko, E. V.; Feldman, V. I. *Phys. Chem. Chem. Phys.*, **2016**, *18*, 47, 32503–32513.
- S16. Khoshkhoo, H.; Nixon, E. R. *Spectrochim. Acta*, **1973**, *29*, 4, 603–612.
- S17. Nelander, B. *J. Chem. Phys.*, **1980**, *73*, 3, 1026–1033.
- S18. Milligan, D. E.; Jacox, M. E. *J. Chem. Phys.*, **1969**, *51*, 1, 277–288.
- S19. Maier G.; Lautz, C. *Eur. J. Org. Chem.*, **1998**, *1998*, 5, 769–776.
- S20. Pettersson, M.; Khriachtchev, L.; Jolkkonen, S.; Räsänen, M. *J. Phys. Chem. A*, **1999**, *103*, 45, 9154–9162.
- S21. Dubost, H. *Chem. Phys.*, **1976**, *12*, 2, 139–151.
- S22. Govender, M. G.; Ford, T. A. *J. Mol. Struct.*, **2000**, *550*, 445–454.
- S23. Milligan, D. E.; Jacox, M. E. *J. Chem. Phys.*, **1967**, *47*, 12, 5146–5156.
- S24. Thompson, M. G.; Parnis, J. M. *J. Phys. Chem. A*, **2008**, *112*, 47, 12109–12116.
- S25. Jones, L. H.; Ekberg, S. A. *J. Chem. Phys.*, **1987**, *87*, 8, 4368–4370.
- S26. Coussan, S.; Alikhani, M. E.; Perchard, J. P.; Zheng, W. Q. *J. Phys. Chem. A*, **2000**, *104*, 23, 5475–5483.
